# Supplementary material for: The Nutrition Literacy Assessment Instrument for Brazilians, NLit-Br: An Exploratory Cross-Cultural Validity Study
Source: MDPI journal article supplement (doi:10.3390/nu14224914), 2022-11-20
Supplement: s1 [file s1]

**Instrumento de Avaliação de Letramento Nutricional  
(NLit)**

Código do participante: \_\_\_\_\_

Início do preenchimento: \_\_\_\_\_

Fim do preenchimento: \_\_\_\_\_

Essa ferramenta irá ajudar a equipe de pesquisa a ter uma ideia das informações sobre nutrição que você já sabe e o que pode ser novo para você.

**\*\*Por favor, continue na próxima página\*\***

## Nutrição e Saúde

**Orientações:** Por favor, leia o texto abaixo e responda as seguintes questões.

Manter uma alimentação saudável e se exercitar são fatores-chave para uma boa saúde e qualidade de vida. Uma dieta saudável ajuda a prevenir, retardar ou melhorar as doenças crônicas. Algumas dessas doenças incluem: doenças do coração, hipertensão, diabetes tipo 2 e câncer. Uma alimentação saudável também ajuda as pessoas a atingir um peso adequado.

Uma alimentação saudável tem grande quantidade de **alimentos ricos em nutrientes**, como frutas, legumes e grãos integrais. Uma alimentação saudável também tem uma baixa quantidade de **alimentos ricos em calorias**, como farinhas refinadas e alimentos com adição de açúcar. Apesar desses alimentos proverem energia, muita energia pode levar a ganho de peso e doenças crônicas.

Para seguir uma alimentação saudável, **coma mais**:

- **Alimentos ricos em nutrientes:** Frutas e vegetais são excelentes fontes de vitaminas e minerais, além de outros nutrientes necessários para a saúde. Ao mesmo tempo, eles tem uma baixa quantidade de calorias. Comer mais desses alimentos pode ajudar no controle de peso e a diminuir o risco de doenças.
- **Alimentos integrais:** Alimentos feitos de sementes inteiras de trigo, arroz, aveia ou cevada são conhecidos como alimentos integrais. Alimentos integrais são ricos em nutrientes e podem promover controle de peso e diminuição do risco de doenças.
- **Alimentos ricos em proteínas com baixo teor de gordura:** Alimentos como peixe, frango e peru (sem pele), laticínios com baixo teor de gordura, carne magra, feijão e lentilha, são também alimentos ricos em nutrientes quando preparados com poucas calorias adicionadas.

Para seguir uma alimentação saudável, **coma menos**:

- **Alimentos ricos em calorias:** Calorias são fontes de energia para o corpo. Alguns alimentos, como batatas chips, refrigerante, açúcar, sucos de frutas industrializados e sobremesas são ricos em calorias e pobres em nutrientes necessários. Esses alimentos são conhecidos como alimentos ricos em calorias. Comer muito esses alimentos pode levar a um aumento de peso e do risco de doenças.
- **Alimentos refinados:** Esses alimentos perdem parte do grão que é rico em nutrientes. Alguns exemplos incluem o pão branco, biscoitos em geral, o arroz branco e o macarrão. Alimentos refinados são pobres em nutrientes necessários e muitos podem levar ao ganho de peso.
- **Gordura saturada e colesterol** são nutrientes principalmente encontrados em alimentos de origem animal, como carnes gordas e laticínios integrais. Esses

nutrientes podem aumentar os níveis de colesterol no sangue, uma condição que pode reduzir o fluxo de sangue para o coração.

- **Sódio** é encontrado no sal de cozinha e em vários alimentos industrializados. Ingerir menos sódio pode diminuir a pressão arterial. A pressão alta é prejudicial, porque pode fazer com que o coração tenha que trabalhar mais.
- **Alimentos com adição de açúcar** são alimentos que tem altos níveis de açúcar e poucos nutrientes, como refrigerantes, sobremesas e doces. Comer muito desses alimentos pode levar ao ganho de peso e causar aumento do açúcar no sangue para aqueles que tem diabetes.

**Instruções:** Escolha a melhor resposta para as questões abaixo. Você pode voltar a ler o texto da página anterior para ajudar a escolher suas respostas.

1. Alimentos como \_\_\_\_\_ devem ser incluídos com maior frequência em uma dieta saudável.

- A. carne vermelha
- B. manteiga
- C. cereais integrais
- D. farinhas refinadas

2. Um exemplo de alimento rico em calorias é o (a) \_\_\_\_\_.

- A. sorvete
- B. aveia
- C. laranja
- D. cenoura

3. Alimentos com muitos nutrientes como os (as) \_\_\_\_\_ deve ser consumida (o) mais frequentemente.

- A. refrigerantes
- B. batatas fritas
- C. frutas
- D. sucos industrializados

4. A couve-flor é um exemplo de alimento que é rico em \_\_\_\_\_.

- A. energia
- B. proteína
- C. nutrientes
- D. calorias

5. A Gordura saturada é mais encontrada em alimentos \_\_\_\_\_.

- A. de origem animal
- B. de origem vegetal
- C. fontes de grãos
- D. fontes de açúcar

6. Qual refeição tem mais nutrientes?

- A. Hambúrguer com pão, batatas chips, leite desnatado
- B. Macarrão com molho de carne, pão de alho, leite desnatado.
- C. Frango sem pele, feijão cozido no vapor, fruta
- D. Costeleta de porco, arroz branco cozido no vapor, leite desnatado.

7. Diminuir a ingestão de sal na alimentação pode diminuir o (a) \_\_\_\_\_, sendo bom para o coração.

- A. glicose sanguínea
- B. pressão arterial
- C. sódio no sangue
- D. colesterol no sangue

8. Um exemplo de alimento com adição de açúcar é o (a) \_\_\_\_\_.

- A. leite
- B. cenoura
- C. arroz integral
- D. pudim de leite condensado

9. Um exemplo de bebida com muitas calorias é o \_\_\_\_\_.

- A. refrigerante diet
- B. suco industrializado
- C. café preto
- D. chá sem açúcar

10. Qual dos seguintes alimentos tem mais sódio?

- A. Catchup
- B. Brócolis congelado
- C. Suco de laranja natural
- D. Morangos

**Macronutrientes:** Essas questões são sobre carboidratos, proteínas e gorduras, que são fontes de energia para o corpo.

**Instruções:** Use os seus conhecimentos sobre nutrição para responder as perguntas abaixo.

11. As calorias dos alimentos como azeite e manteiga vem do seu alto conteúdo de \_\_\_\_\_.

- A. vitamina
- B. carboidrato
- C. proteína
- D. gordura

12. O \_\_\_\_\_ encontrado no suco de laranja natural é um tipo de carboidrato.

- A. açúcar
- B. cálcio
- C. amido
- D. folato

13. Uma boa fonte de \_\_\_\_\_ é encontrada em alimentos como ovos, frango e peixe.

- A. amido
- B. proteína
- C. fibra
- D. carboidrato

14. Qual grupo de alimentos fornece mais proteína?

- A. Pão, arroz, macarrão.
- B. Banana, vinagre, brócolis.
- C. Costeleta de porco, ovo, queijo.
- D. Coalhada, azeite de oliva, molho para salada.

15. Qual grupo de alimentos fornece mais carboidratos?

- A. Aveia, arroz, batata.
- B. Ovo, manteiga, queijo.
- C. Amendoim, bacon, óleo vegetal.
- D. Frango, linguiça, peixe.

16. Qual grupo de alimentos fornece mais gordura?

- A. Arroz, tapioca, biscoito de sal.
- B. Batata, pera, leite.
- C. Cenoura, abacate, iogurte.
- D. Maionese, margarina, azeite de oliva.

17. Qual café da manhã é o que contem mais carboidratos?

- A. Suco de laranja, torrada com geleia de morango
- B. Suco de laranja, queijo
- C. Leite semidesnatado, torrada com manteiga
- D. Leite semidesnatado, presunto

18. Se o seu médico fala para você comer mais proteína, qual alimento é a melhor escolha para aumentar a proteína e gorduras saudáveis em sua alimentação?

- A. Peixe
- B. Linguiça
- C. Queijo
- D. Pão

19. Se o seu médico te fala para você comer menos gordura, qual alimento você deve comer com menor frequência?

- A. Feijão preto
- B. Maionese
- C. Batata
- D. Pão

20. O Azeite de oliva é mais saudável que a margarina porque:

- A. é natural
- B. tem menos gordura
- C. tem menos calorias
- D. tem tipos de gordura mais saudáveis.

## Rótulo de alimentos e Números

Este rótulo de alimento à direita foi retirado de um pacote de macarrão instantâneo.

21. Quantas calorias você irá consumir se comer **todo o pacote**?

- A. 259 calorias
- B. 388 calorias
- C. 184 calorias
- D. 738 calorias

22. Se você está tentando comer menos de 500mg de sódio por refeição, quanto desse alimento você pode comer, sem nenhum acompanhamento?

- A. Menos da metade do pacote
- B. Metade do pacote
- C. Mais da metade do pacote
- D. O pacote inteiro

### Embalagem de macarrão instantâneo

| INFORMAÇÃO NUTRICIONAL                                                                                                                                                          |                       |         |
|---------------------------------------------------------------------------------------------------------------------------------------------------------------------------------|-----------------------|---------|
| Porção de 85g (1 pacote)                                                                                                                                                        |                       |         |
| 80g de macarrão + 5g de tempero                                                                                                                                                 |                       |         |
|                                                                                                                                                                                 | Quantidade por porção | %VD (*) |
| Valor energético                                                                                                                                                                | 388 kcal = 1629 kJ    | 19%     |
| Carboidratos                                                                                                                                                                    | 54 g                  | 18%     |
| Proteínas                                                                                                                                                                       | 7,0 g                 | 9%      |
| Gorduras totais                                                                                                                                                                 | 16 g                  | 29%     |
| Gorduras saturadas                                                                                                                                                              | 7,6 g                 | 34%     |
| Gorduras <i>trans</i>                                                                                                                                                           | 0 g                   | ...     |
| Fibra alimentar                                                                                                                                                                 | 1,0 g                 | 4%      |
| Sódio                                                                                                                                                                           | 1630 mg               | 68%     |
| * % Valores Diários de referência com base em uma dieta de 2000 kcal ou 8400 kJ. Seus valores diários podem ser maiores ou menores dependendo de suas necessidades energéticas. |                       |         |
| ** VD não estabelecido.                                                                                                                                                         |                       |         |

23. Se você está limitando o consumo total de gordura para 65 gramas por dia, e você come um (1) pacote de macarrão instantâneo. Olhando a quantidade de gordura no rótulo, qual é o total de gordura que você pode comer de outros alimentos?

- A. 39 gramas
- B. 16 gramas
- C. 49 gramas
- D. 59 gramas

24. Qual é o total de carboidrato em gramas que você comeria em meio pacote de macarrão instantâneo?

- A. 15 gramas
- B. 25 gramas
- C. 27 gramas
- D. 54 gramas

25. Se você é aconselhado a aumentar sua ingestão de fibras, o macarrão é uma boa escolha alimentar?

- A. Sim
- B. Não



26. Se você está tentando limitar sua ingestão de gorduras saturadas para 7 gramas por refeição, quanto de macarrão instantâneo você pode comer, sem acompanhamento?

- A. O pacote inteiro
- B. Menos de um pacote inteiro
- C. Metade do pacote
- D. Mais da metade do pacote

27. Se você comer meio pacote deste macarrão instantâneo, qual o total de gordura em gramas que você irá comer?

- A. 7 gramas
- B. 16 gramas
- C. 8 gramas
- D. 6 gramas

28. Quantos gramas de proteína você irá consumir se comer um (1) pacote?

- A. 7,6 gramas
- B. 7,0 gramas
- C. 3,5 gramas
- D. 1,0 gramas

29. Se você é aconselhado a comer 45 gramas de carboidrato **por refeição**, e come meio pacote de macarrão instantâneo, qual a quantidade de carboidratos em gramas que você deve comer de outro alimento na mesma refeição?

- A. 9 gramas
- B. 10 gramas
- C. 18 gramas
- D. 20 gramas

30. Se seu médico te aconselha a limitar o consumo total de gordura para 64 gramas **por dia**, qual a porcentagem diária de gordura que você terá consumido se comer um pacote de macarrão instantâneo?

- A. 10%
- B. 15%
- C. 18%
- D. 25%

#### Embalagem de macarrão instantâneo

| INFORMAÇÃO NUTRICIONAL                                                                                                                                                          |                       |         |
|---------------------------------------------------------------------------------------------------------------------------------------------------------------------------------|-----------------------|---------|
| Porção de 85g (1 pacote)                                                                                                                                                        |                       |         |
| 80g de macarrão + 5g de tempero                                                                                                                                                 |                       |         |
|                                                                                                                                                                                 | Quantidade por porção | %VD (*) |
| Valor energético                                                                                                                                                                | 388 kcal = 1629 kJ    | 19%     |
| Carboidratos                                                                                                                                                                    | 54 g                  | 18%     |
| Proteínas                                                                                                                                                                       | 7,0 g                 | 9%      |
| Gorduras totais                                                                                                                                                                 | 16 g                  | 29%     |
| Gorduras saturadas                                                                                                                                                              | 7,6 g                 | 34%     |
| Gorduras <i>trans</i>                                                                                                                                                           | 0 g                   | ...     |
| Fibra alimentar                                                                                                                                                                 | 1,0 g                 | 4%      |
| Sódio                                                                                                                                                                           | 1630 mg               | 68%     |
| * % Valores Diários de referência com base em uma dieta de 2000 kcal ou 8400 kJ. Seus valores diários podem ser maiores ou menores dependendo de suas necessidades energéticas. |                       |         |
| ** VD não estabelecido.                                                                                                                                                         |                       |         |

## Grupos alimentares

**Código:** \_\_\_\_\_

Esta é uma lista de alimentos. Usando o quadro abaixo, escreva o nome de cada alimento no seu grupo pertencente, de acordo com o seu valor nutricional. Exemplo:

**Pão** (veja abaixo)

|                             |                  |                          |                      |
|-----------------------------|------------------|--------------------------|----------------------|
| 31. Maçã                    | 35. Queijo       | 39. Costela de porco     | 43. Alface           |
| 32. Leite                   | 36. Arroz branco | 40. Cenoura              | 44. Banana           |
| 33. Macarrão                | 37. Aveia        | 41. Manteiga             | 45. Maionese         |
| 34. Suco de Laranja Natural | 38. Frango       | 42. Suco industrializado | 46. Geleia de Frutas |

| Grãos      | Vegetais | Frutas | Proteína | Laticínios | Óleos e gorduras | Açúcares adicionados |
|------------|----------|--------|----------|------------|------------------|----------------------|
| <i>Pão</i> |          |        |          |            |                  |                      |

## Habilidades como consumidor

**Instruções:** Escolha a melhor resposta para as questões a seguir.

47. Se as calorias são iguais para uma porção de cada alimento, qual alimento tem mais nutrientes?

- A. Suco de abacaxi industrializado sem adição de açúcar
- B. Abacaxi
- C. Suco de abacaxi industrializado sem adição de açúcar tem a mesma quantidade de nutrientes do que o abacaxi.

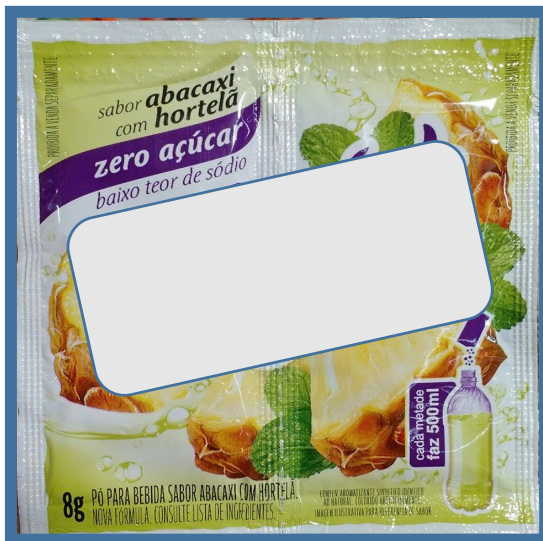

Suco de abacaxi industrializado sem adição de açúcar

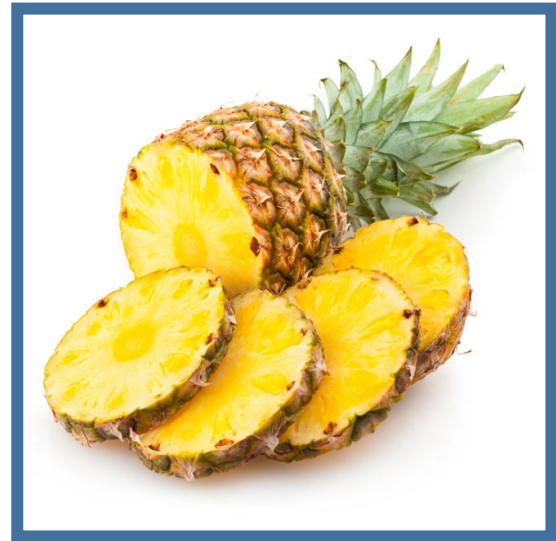

Abacaxi

48. Se as calorias são iguais para uma porção de cada alimento, qual alimento é o lanche mais saudável?

- A. Barra de fruta
- B. Uva passa
- C. Barra de fruta é igual a uva passa em termos nutricionais

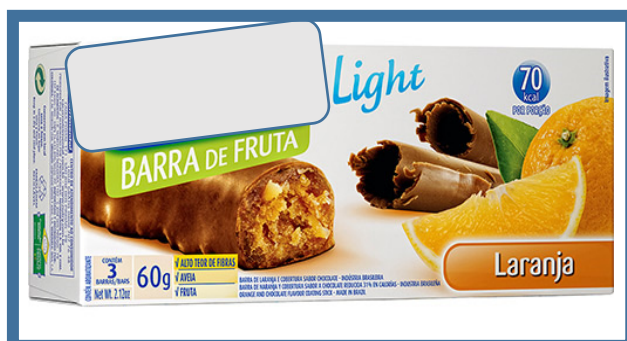

Barra de fruta

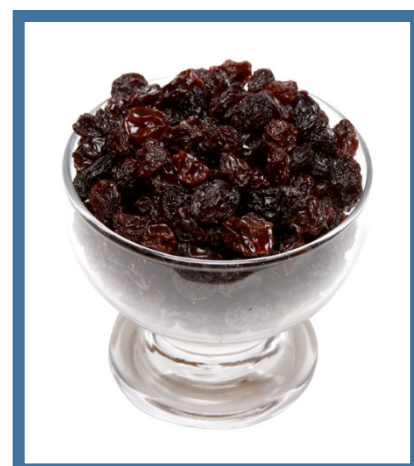

Uva passa

**Instruções:** Escolha a melhor resposta para as questões a seguir.

49. Se as porções são iguais, qual carne tem menos gordura?

- A. Contrafilé
- B. Patinho
- C. Contrafilé e Patinho tem a mesma quantidade de gordura.

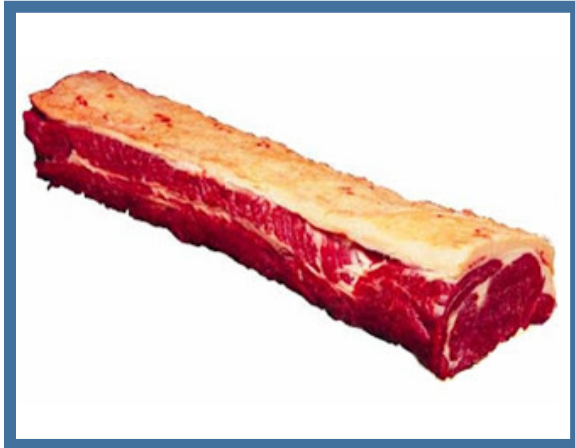

Contrafilé

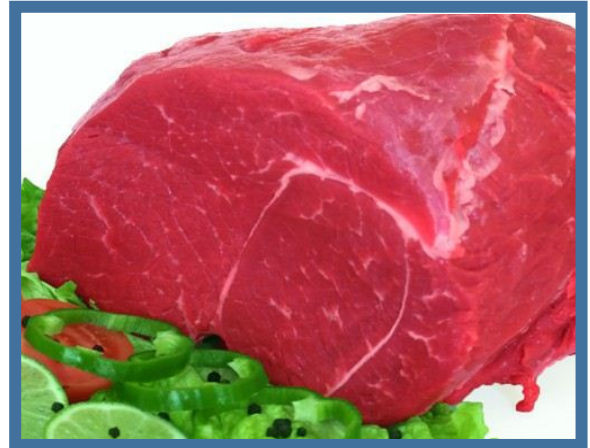

Patinho

50. Qual bebida tem mais calorias por copo (240mL)?

- A. Leite desnatado
- B. Suco de goiaba industrializado
- C. Leite desnatado e suco de goiaba industrializado são iguais em calorias

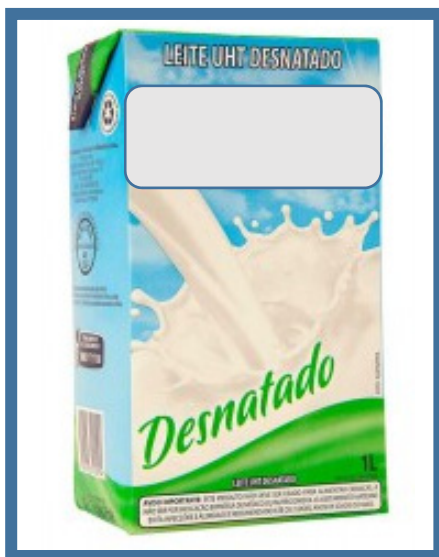

Leite desnatado

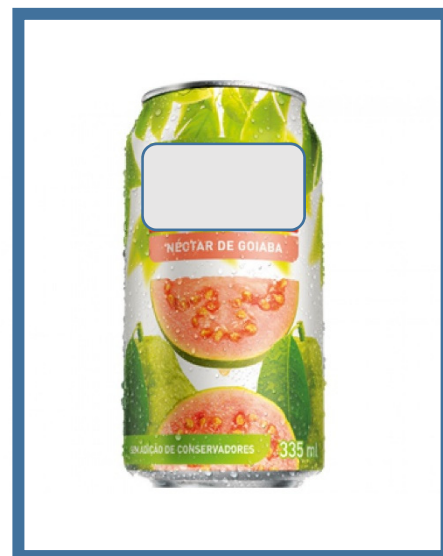

Suco de goiaba  
industrializado

51. Qual opção de ervilha tem menos sódio?

- A. Ervilha enlatada
- B. Ervilha seca
- C. Ervilha enlatada e ervilha seca tem a mesma quantidade de sódio

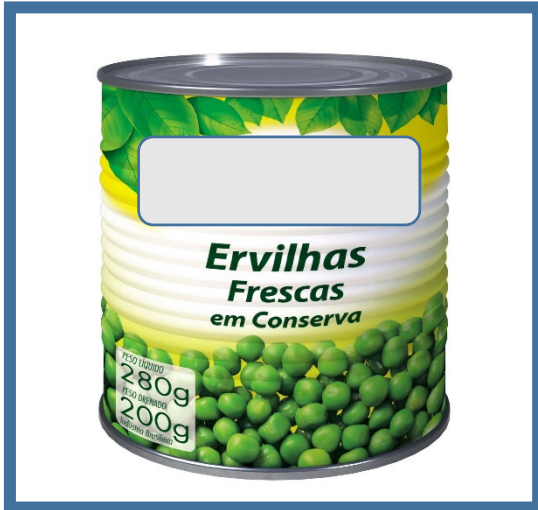

Ervilha enlatada

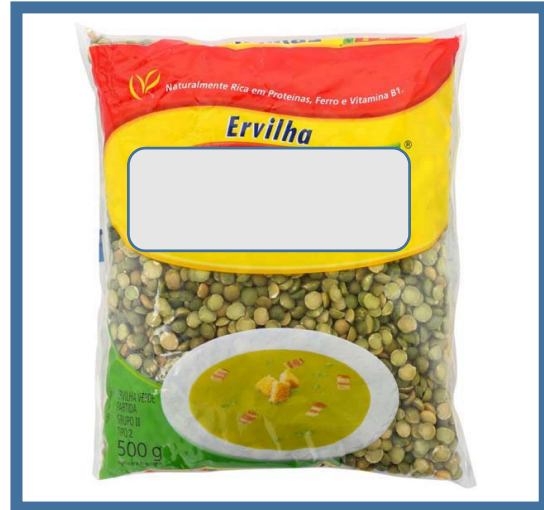

Ervilha seca

52. Qual tipo de salada verde tem mais nutrientes?

- A. Alface
- B. Couve
- C. Alface e couve tem a mesma quantidade de nutrientes.

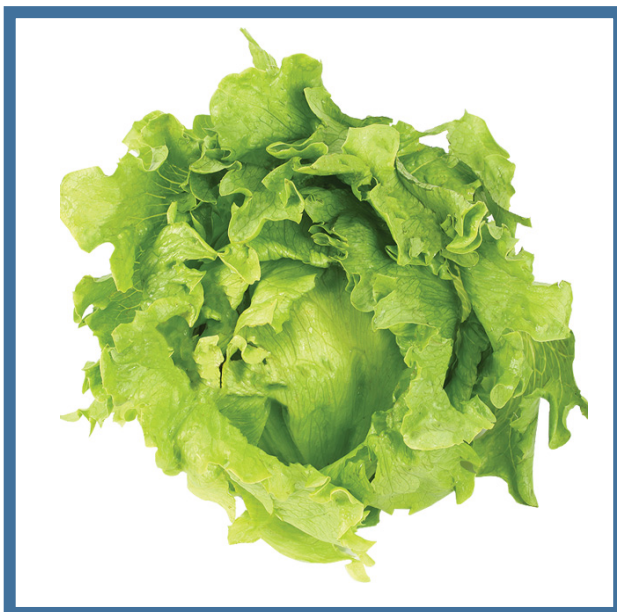

Alface

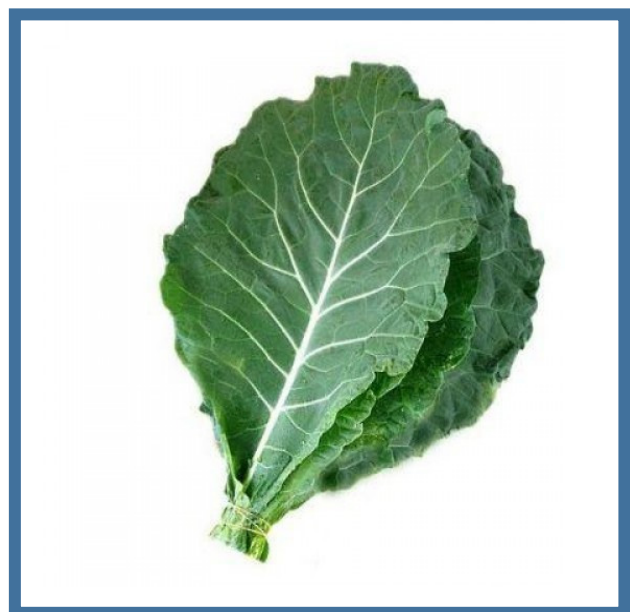

Couve



53. Qual parte do rótulo de alimento fornece a melhor informação sobre a quantidade de açúcar?

- A. Informação nutricional
- B. Informação da embalagem que diz “Diet”
- C. A informação nutricional e a informação da embalagem que diz “Diet” são fontes iguais de informação sobre a quantidade de açúcar.

Este não é um alimento com valor energético reduzido.

| INFORMAÇÃO NUTRICIONAL  |                       |      |
|-------------------------|-----------------------|------|
| Porção de 40g (1 fatia) |                       |      |
|                         | Quantidade por porção | %VD* |
| Valor energético        | 113 kcal = 475kJ      | 6%   |
| Carboidratos            | 28 g dos quais        | 9%   |
| Açúcares                | 11 g                  |      |
| Políols                 | 10 g                  |      |
| Amido                   | 0                     |      |
| Outros Carboidratos     | 6,9 g                 |      |
| Proteínas               | 3,1 g                 | 4%   |
| Gorduras totais         | 1,1 g                 | 2%   |
| Gorduras saturadas      | 0,3 g                 | 1%   |
| Gorduras trans          | 0                     | **   |
| Fibra alimentar         | 6,9 g                 | 28%  |
| Sódio                   | 11 mg                 | 0%   |

\* % Valores Diários com base em uma dieta de 2.000 kcal ou 8.400 kJ. Seus valores diários podem ser maiores ou menores dependendo de suas necessidades energéticas.  
\*\* Valores Diários não estabelecidos

Informação nutricional

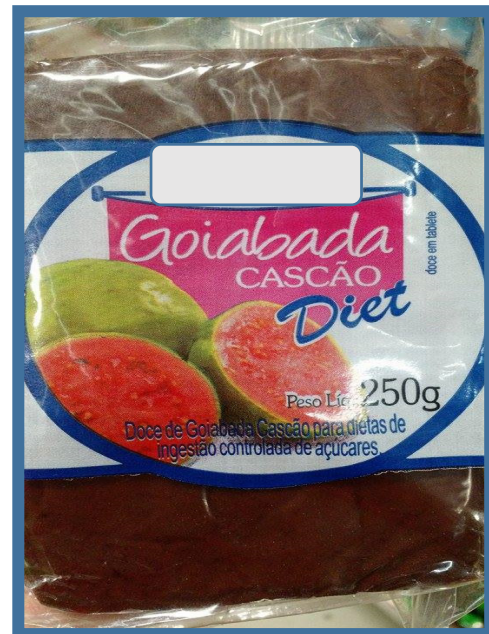

Informação do pacote que diz “Diet”

54. Se as calorias são iguais, qual alimento é mais nutritivo?

- A. Uva
- B. Suco de uva
- C. Uva e suco de uva tem a mesma quantidade de nutrientes

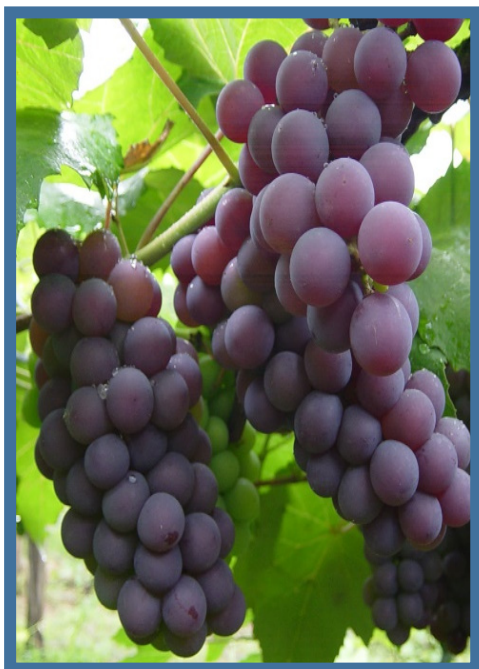

Uvas

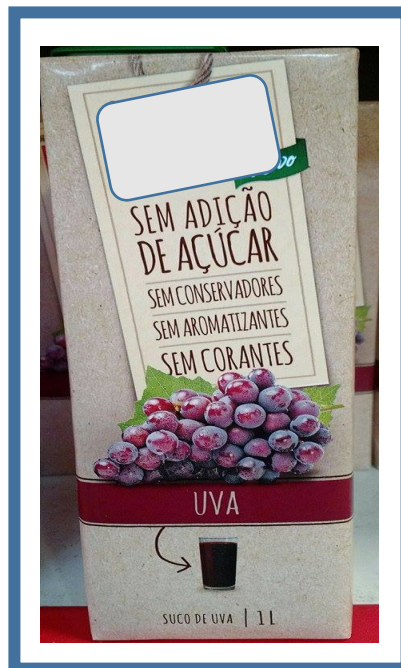

Suco de uva

55. Qual parte do rótulo de alimentos tem a melhor informação para a escolha de um alimento integral?

- A. Pacote com a afirmação “Integral”
- B. Lista de ingredientes
- C. Pacote com a afirmação “Integral” e lista de ingredientes são fontes iguais de informação nutricional.

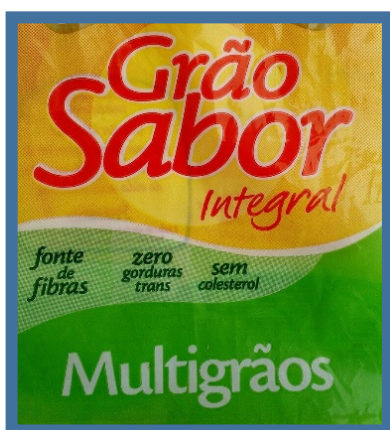

Pacote com a afirmação “Integral”

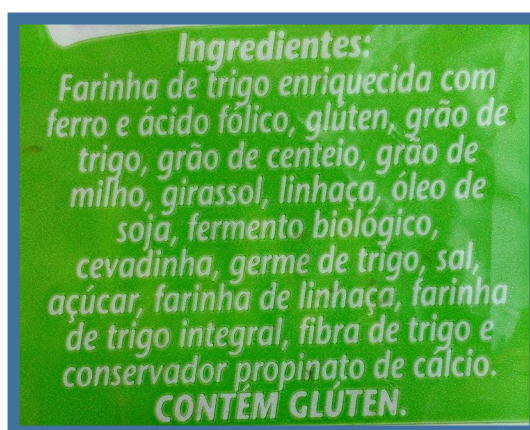

Lista de ingredientes

**\*\*PARE AQUI. Por favor, entregue esse instrumento para a equipe de pesquisa.\*\***
